# Supplementary material for: MobileSkin: Classification of Skin Lesion Images Acquired Using Mobile Phone-Attached Hand-Held Dermoscopes
Source: J Clin Med. 2022 Aug 30;11(17):5102. doi: 10.3390/jcm11175102 (PMC9457478; doi:10.3390/jcm11175102)
Supplement: Supplementary file 1 [file jcm-11-05102-s001.zip]

Archive with 11 entries (11 files):
- Figure S1.png
- Figure S10.png
- Figure S2.png
- Figure S3.png
- Figure S4.png
- Figure S5.png
- Figure S6.png
- Figure S7.png
- Figure S8.png
- Figure S9.png
- Supplementary Figures.pdf
